# Supplementary material for: A microfluidic immunosensor for automatic detection of carcinoembryonic antigen based on immunomagnetic separation and droplet arrays
Source: Royal Society of Chemistry journal article supplement (doi:10.1039/d2an01922a), 2023-01-01
Supplement: d2an01922a1.pdf [file d2an01922a1.pdf]

# **A microfluidic immunosensor for automatic detection of carcinoembryonic antigen based on immunomagnetic separation and droplet array**

**Haoran Hu<sup>1, 2, 3, #</sup>, Gaozhe Cai<sup>2, #</sup>, Zehang Gao<sup>2, 4</sup>, Cheng Liang<sup>5</sup>, Fengna Yang<sup>1, 3</sup>,  
Xiaohui Dou<sup>1, 3</sup>, Chunping Jia<sup>2</sup>, Jianlong Zhao<sup>2</sup>, Shilun Feng<sup>2, \*</sup>, Bei Li<sup>1, 3, \*</sup>**

<sup>1</sup> School of Ophthalmology & Optometry, Eye Hospital, Wenzhou Medical University, Wenzhou, 325027, China

<sup>2</sup> State Key Laboratory of Transducer Technology, Shanghai Institute of Microsystem and Information Technology, Chinese Academy of Sciences, Shanghai 200050, China

<sup>3</sup> State Key Laboratory of Applied Optics, Changchun Institute of Optics, Fine Mechanics and Physics, Chinese Academy of Sciences, Changchun, 130033, PR China

<sup>4</sup> Department of Clinical Laboratory, Third Affiliated Hospital of Guangzhou Medical University, Guangdong 510150, China

<sup>5</sup> State Key Laboratory of Marine Resources Utilization in South China Sea and Center for Eco-Environment Restoration of Hainan Province, Hainan University, Haikou 570228, China

<sup>#</sup> The authors contributed equally to this work

<sup>\*</sup> Corresponding author

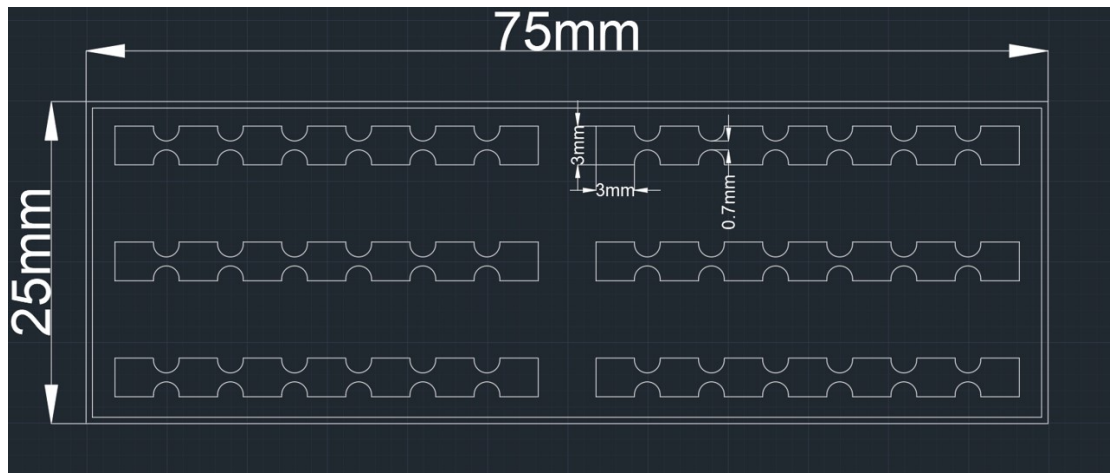

Figure S1 : CAD design drawing of chip structure. The chip is 75 mm long and 25 mm wide. Each channel is composed of seven 3 mm square chambers and 0.7 mm link channels and the whole chip has 6 channels.

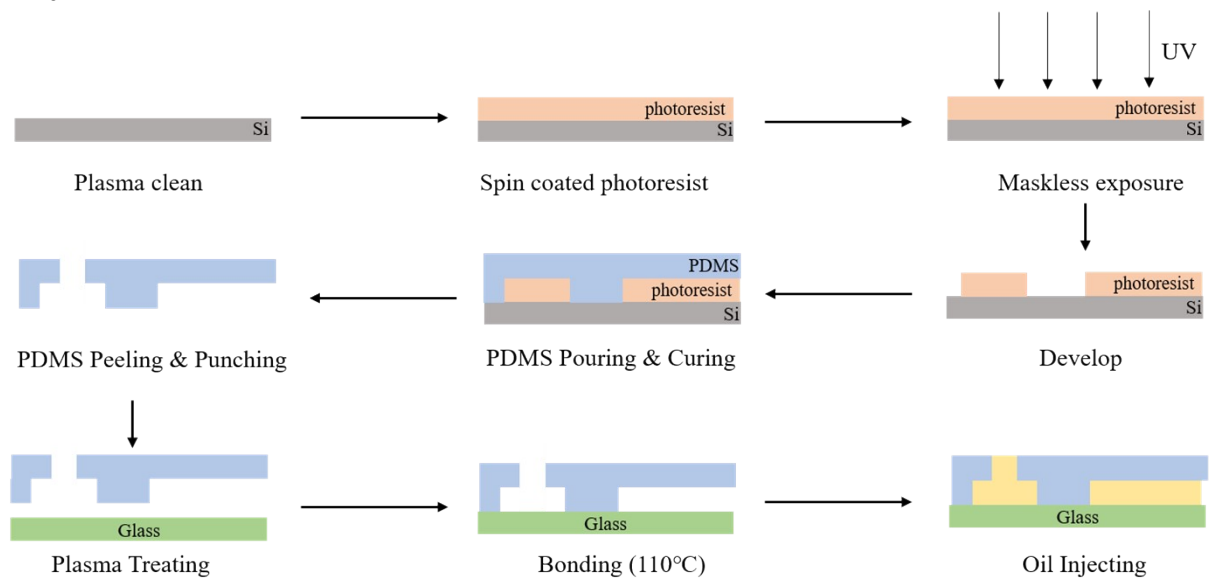

Figure S2: Chip manufacturing process.
